## Simultaneous multiplexed amplicon sequencing and transcriptome profiling in single cells

**Authors:** Mridusmita Saikia<sup>1,2,\*</sup>, Philip Burnham<sup>1,\*</sup>, Sara H. Keshavjee<sup>1</sup>, Michael F. Z. Wang<sup>1</sup>, Michael Heyang<sup>1</sup>, Pablo Moral-Lopez<sup>2</sup>, Meleana M. Hinchman<sup>2</sup>, Charles G. Danko<sup>2</sup>, John S. L. Parker<sup>2</sup>, Iwijn De Vlaminck<sup>1</sup>

\*These authors contributed equally

To whom correspondence should be addressed: [vaminck@cornell.edu](mailto:vaminck@cornell.edu)

### Affiliations:

<sup>1</sup>Meinig School of Biomedical Engineering, Cornell University, Ithaca, NY 14853, USA

<sup>2</sup>Baker Institute for Animal Health, College of Veterinary Medicine, Cornell University, Ithaca, NY 14853, USA

**Abstract:** We describe Droplet Assisted RNA Targeting by single cell sequencing (DART-seq), a versatile technology that enables multiplexed amplicon sequencing and transcriptome profiling in single cells. We applied DART-seq to simultaneously characterize the non-A-tailed transcripts of a segmented dsRNA virus and the transcriptome of the infected cell. In addition, we used DART-seq to simultaneously determine the natively paired, variable region heavy and light chain amplicons and the transcriptome of B lymphocytes.

1 Droplet microfluidics has made high-throughput single-cell RNA sequencing accessible  
2 to more laboratories than ever before, but is restricted to capturing information from the  
3 ends of A-tailed messenger RNA (mRNA) transcripts<sup>1-3</sup>. Here we report DART-seq, a  
4 method that enables high-throughput targeted RNA amplicon sequencing and  
5 transcriptome profiling in single cells. DART-seq achieves this via a simple and  
6 inexpensive alteration of the Drop-seq strategy<sup>1</sup>. Drop-seq relies on co-encapsulation of  
7 single cells with barcoded primer beads that capture and prime reverse transcription (RT)  
8 of cellular mRNA<sup>1,2</sup>. The primers on Drop-seq beads comprise a common PCR sequence,  
9 a bead-specific cell barcode, a unique molecular identifier (UMI), and a poly-dT sequence  
10 for mRNA RT priming. To enable simultaneous measurement of the transcriptome and  
11 multiplexed RNA amplicons in DART-seq, we devised a scheme to enzymatically attach  
12 custom primers to a subset of poly-dTs on Drop-seq beads. This is achieved by first  
13 annealing a double-stranded toehold probe with a 3' ssDNA overhang that is  
14 complementary to the poly-dT sequence, and then ligating the toehold using T4 DNA  
15 ligase (Fig. S1). A variety of custom primers with different sequences can be attached to  
16 the same beads in a single reaction.

17  
18 We characterized the efficiency, tunability and variability of the ligation reaction using  
19 fluorescence hybridization assays (Fig. 1a and Fig. S2). We found that the primer ligation  
20 reaction is highly efficient (25-40%), and the number of custom primers ligated to the  
21 beads is directly proportional to the number of primers included in the ligation reaction  
22 (Fig. 1a). This was true for four primer sequences tested over a wide range of primer  
23 concentrations. The efficiency of probe ligation decreased for ligation reactions with more  
24 than  $10^{10}$  molecules per bead, indicating saturation of available oligo(dT)s. We compared  
25 the fluorescence hybridization signal across individual beads and found that the bead-to-  
26 bead variability in fluorescence signal is small (standard deviation 3.0%, Fig. 1b).

27  
28 After primer bead synthesis, DART-seq follows the Drop-seq workflow without  
29 modification. Cells and primer beads are co-encapsulated in droplets using microfluidics.  
30 Cellular RNA is captured by the beads, and reverse transcribed. The DART-seq beads  
31 prime RT of both A-tailed mRNA and custom RNA amplicons. The resulting  
32 complementary DNA (cDNA) is PCR-amplified, tagmented, and again PCR amplified  
33 before sequencing. The cell-of-origin of mRNAs and RNA amplicons is identified by  
34 decoding the cell barcodes.

35  
36 We assessed RT priming efficiency as a function of the number of custom primers ligated  
37 to DART-seq beads. We used quantitative PCR (qPCR) to measure the yield of cDNA  
38 copies of a non-A-tailed viral mRNA in reovirus-infected murine fibroblasts (L cells, Fig.  
39 1c). Two distinct primers were ligated, targeting the same viral genome segment (S2).  
40 The yield of cDNA copies of viral mRNA, relative to cDNA copies of a host transcript

1 (*Gapdh*), increased with the number of primers included in the ligation reaction, and  
2 saturated for reactions with over  $10^9$  primers per bead (Fig. 1c). RT of *Gapdh* was not  
3 affected for DART-seq beads prepared with up to  $10^{10}$  primers per bead.

4  
5 Next, we evaluated the abundance of amplicons in sequencing libraries of reovirus  
6 infected cells generated by Drop-seq, and a DART-seq assay targeting all ten viral  
7 genome segments. We designed seven qPCR assays with amplicons distributed across  
8 two viral genome segments (S3 and L3). To account for assay-to-assay and sample-to-  
9 sample variability, we normalized the number of molecules detected in DART-seq and  
10 Drop-seq libraries to the number of *Gapdh* transcripts. We observed significant  
11 enrichment upstream (5'-end), but not downstream (3'-end) of the custom primer sites  
12 (Fig. 1d). Consistent with sequencing library preparation via tagmentation, we found that  
13 the degree of enrichment decreases with distance from the primer site.

14  
15 We applied DART-seq to investigate the heterogeneity of cellular phenotypes and viral  
16 genotypes during T3D reovirus infection. Recent studies have explored RNA virus  
17 infection biology in single cells<sup>4-6</sup>, but were limited by cell throughput or restricted to the  
18 analysis of polyadenylated viral mRNAs. We infected L cells at a high multiplicity of  
19 infection (MOI 10), ensuring nearly all cells were infected (Fig. 2a). We performed Drop-  
20 seq and DART-seq experiments on infected and non-infected cells and implemented two  
21 DART-seq designs. The first targeted each viral genome segment with a single amplicon.  
22 The second comprised seven amplicons distributed across the S2 segment (Fig. 2b).

23  
24 We analyzed the sequence coverage upstream of the DART-seq target sites. For both  
25 DART-seq designs, all targeted sites were enriched compared to Drop-seq (Fig. 2c, d).  
26 For design-1, we observed a mean enrichment of 34.7x 200 nt upstream of the custom  
27 primer sites. Viral transcripts were detected in Drop-seq upstream of A-rich sequences in  
28 the viral genome, consistent with spurious RT priming by oligo(dT) primers (Fig. 2c). Viral  
29 sequences were not detected in DART-seq or Drop-seq assays of non-infected cells.  
30 Experiments on an independent sample revealed similar sequencing coverage tracks  
31 across the reovirus genome (Fig. S3).

32  
33 We tested the utility of DART-seq to measure the heterogeneity of viral genotypes in  
34 single cells with DART-seq design-2, which was tailored to retrieve the complete S2  
35 segment. DART-seq design-2 increased the mean coverage across S2 430-fold  
36 compared to Drop-seq (cells with at least 1500 UMIs, Fig. 2e), enabling point mutation  
37 analysis. We identified 176 single-nucleotide variants (see Methods). Mutations from  
38 guanine-to-adenine (G-to-A) were most common (58%; Fig. 2f, top), though G-to-A  
39 mutational loads (mean 13%) varied across cells (Fig. 2f, bottom). We did not observe  
40 the G-to-A hypermutation in a highly expressed host transcript (*Actb*). The high G-to-A

1 transition rate in viral transcripts could be secondary to a defect in viral transcription  
2 fidelity. The T3D strain used in this study has strain-specific allelic variation in polymerase  
3 co-factor  $\mu 2$ , which may affect the capacity of  $\mu 2$  to associate with microtubules and the  
4 encapsidation of viral mRNAs<sup>7,8</sup>.

5  
6 We identified four distinct cell subpopulations, after dimensional reduction and  
7 unsupervised clustering (design-1, Fig. 2g; Methods). Two major clusters comprised cells  
8 with elevated gene expression related to transcription and replication (*Rpl36a*, cluster 1)  
9 and metabolic pathways (*Ugdh*, cluster 2). Two additional clusters revealed upregulation  
10 of genes related to mitotic function (*Cdc20*, cluster 3) and innate immunity (*Ifit1*, cluster  
11 4). The abundance of viral transcripts relative to host transcripts was significantly elevated  
12 for cells in cluster 3 (Fig. 2h;  $p = 1.0 \times 10^{-4}$ ). We combined all datasets and quantified the  
13 cell type composition for each experiment. We did not observe cells related to cluster 4  
14 (immune response) for the non-infected control (Fig. 2i).

15  
16 We next explored the biological corollary of infection, the cellular immune response. The  
17 adaptive immune response relies on a diverse repertoire of membrane-bound and free  
18 antibodies. Antibody repertoires have previously been examined at depth<sup>9,10</sup> but DART-  
19 seq widens the scope of such studies by providing concurrent transcriptome information.  
20 Antibodies are comprised of heavy and light chains, linked by disulfide bonds. Each chain  
21 contains variable and constant domains. The variable region is comprised of variable (V),  
22 diversity (D) and joining (J) segments in the heavy chain, and V and J segments in the  
23 light chain. We designed DART-seq primers to target VDJ and VJ gene segments in  
24 heavy and light chain transcripts<sup>11</sup> (Fig. 3a).

25  
26 We examined the efficiency of heavy and light chain transcript RT by qPCR (CD19+ B  
27 cells). We observed an enrichment of transcripts for all isotypes tested, as the number of  
28 custom primers on DART-seq beads was increased (Fig. 3b). Next, we compared the  
29 performance of DART-seq and Drop-seq to describe antibody repertoires (Fig. 3c).  
30 Approximately 120,000 B cells were loaded in each reaction, yielding 4909 and 4965  
31 transcriptomes for DART-seq and Drop-seq, respectively. The number of UMIs and genes  
32 detected per cell was similar for DART-seq and Drop-seq (Fig. S4). We mapped transcript  
33 sequences to an immunoglobulin (Ig) sequence database (Methods). For both DART-seq  
34 and Drop-seq, the percentage of cells for which Ig transcripts were detected scaled with  
35 the number of UMIs detected in the cells (Fig. 3c). The Ig transcript recovery rate was  
36 significantly greater for DART-seq. For cells with 1000-1200 UMIs, we identified both  
37 heavy and light chain transcripts in 29% of cells using DART-seq, but in only 3% of cells  
38 using Drop-seq.

39

1 Next we applied DART-seq to determine the B cell antibody repertoire within human  
2 PBMCs (120,000 PBMCs, 4997 single-cell transcriptomes). To identify B cells, we used  
3 dimensional reduction and unsupervised clustering (Methods). We detected Ig transcripts  
4 in 564 of the 818 cells in the B cell cluster, and Ig expression mapped accurately onto the  
5 B cell population (Fig. 3d). DART-seq again outperformed Drop-seq in the recovery of  
6 antibody transcripts (Fig. S5). To test the reproducibility of DART-seq, we assayed an  
7 additional PBMC sample and observed similar Ig recovery rates (Fig. S5). We performed  
8 isotype distribution analysis on CD27+ B cells (Fig. 3e). As expected, CD27+ B cells were  
9 a mixed population of heavy chain isotypes, with IgM most frequently observed, followed  
10 by IgD and IgA<sup>12</sup> (Fig. 3e). Kappa and lambda light chain isotypes were equally  
11 represented, as expected<sup>13-15</sup> (Fig. 3e). B cells for which we did not detect CD27 were  
12 predominantly of the IgM isotype<sup>16</sup> (Fig. 3e). B cells derive their repertoire diversity from  
13 the variable regions of their heavy (IGHV) and light chains<sup>17</sup> (IGKV, IGLV). DART-seq  
14 captured a more diverse population of variable isoforms than Drop-seq (Fig. S6).

15  
16 DART-seq can pair variable heavy and light chain transcripts in single cells. Out of 564  
17 Ig transcript positive cells, we mapped the complete CDR3L in 339 cells and the complete  
18 CDR3H in 236 cells. The complete CDR3L+ CDR3H region was detected in 120 B cells.  
19 The number of VH and VL transcripts in single cells was correlated, as expected (Fig S7).  
20 The CDR3L and CDR3H length distributions had maxima around 30 and 50 nucleotides,  
21 respectively, as described previously<sup>11,18</sup> (Fig. 3f). In line with previous reports,  
22 promiscuous light chain pairing was observed in 73.5% of the repertoires in CD27- B  
23 cells<sup>18</sup>. Finally, we measured clone specific pairing for the heavy (IGHV) and light chain  
24 variable regions (IGKV, IGLV) in 164 single B cells (Fig. 3g). The highest pairing  
25 frequency was observed between the most highly expressed heavy and light chain  
26 transcripts, consistent with previous reports<sup>10,19</sup>.

27  
28 In conclusion, we have presented DART-seq an easy-to-implement droplet microfluidics  
29 technology to perform simultaneous RNA amplicon sequencing and transcriptome  
30 profiling in single cells. DART-seq enables a range of new biological measurements. We  
31 applied DART-seq to study the single-cell heterogeneity of RNA virus infection, thereby  
32 expanding on recent work that has demonstrated the utility to capture viral transcripts,  
33 including non-polyadenylated ones, together with transcriptomes in single cells at  
34 throughput<sup>4-6</sup>. DART-seq combines the ability to study multiple non-polyadenylated viral  
35 RNAs with the simplicity of droplet microfluidics. We furthermore applied DART-seq to  
36 determine the paired heavy and light chain repertoire in human B cells. A number of  
37 methods to reconstruct paired heavy-light chains from B cells have been described<sup>10,18-</sup>  
38 <sup>20</sup>. DART-seq provides a tunable chemistry to simultaneously capture both heavy/light  
39 chains and the rest of the transcriptome, which is a key piece of information to elucidate  
40 the nature of the antibody-producing B cell.

41



## 1 ACKNOWLEDGMENTS

2 We thank Peter Schweitzer and colleagues at the Cornell Biotechnology Resource Center  
3 (BRC) for help with sequencing assays. This work was supported by US National Institute  
4 of Health (NIH) grant 1DP2AI138242 to IDV and National Science Foundation Graduate  
5 Research Fellowship Program (NSF-GRFP) grant DGE-1144153 to PB.

## 7 COMPETING FINANCIAL INTERESTS

8 The authors declare no competing financial interests.

## 10 AUTHOR CONTRIBUTIONS

11 PB, MS, CGD, JSLP and IDV designed the study. PB, MS, SHK, MH, PML and MMH  
12 carried out the experiments. PB, MS, MFZW and IDV analyzed the data. PB, MS and IDV  
13 wrote the manuscript. All authors provided comments.

## 15 REFERENCES

- 17 1. Macosko, E. Z. *et al.* Highly Parallel Genome-wide Expression Profiling of Individual Cells  
18 Using Nanoliter Droplets. *Cell* **161**, 1202–1214 (2015).
- 19 2. Klein, A. M. *et al.* Droplet barcoding for single-cell transcriptomics applied to embryonic  
20 stem cells. *Cell* **161**, 1187–1201 (2015).
- 21 3. Zheng, G. X. Y. *et al.* Massively parallel digital transcriptional profiling of single cells. *Nat.*  
22 *Commun.* **8**, 14049 (2017).
- 23 4. Zanini, F., Pu, S.-Y., Bekerman, E., Einav, S. & Quake, S. R. Single-cell transcriptional  
24 dynamics of flavivirus infection. *Elife* **7**, e32942 (2018).
- 25 5. Russell, A. B., Trapnell, C. & Bloom, J. D. Extreme heterogeneity of influenza virus  
26 infection in single cells. *Elife* **7**, e32303 (2018).
- 27 6. Steuerman, Y. *et al.* Dissection of Influenza Infection In Vivo by Single-Cell RNA  
28 Sequencing. *Cell Syst.* **6**, 679–691.e4 (2018).
- 29 7. Parker, J. S. L., Broering, T. J., Kim, J., Higgins, D. E. & Nibert, M. L. Reovirus Core  
30 Protein  $\mu 2$  Determines the Filamentous Morphology of Viral Inclusion Bodies by  
31 Interacting with and Stabilizing Microtubules. *J. Virol.* **76**, 4483 LP-4496 (2002).
- 32 8. Ooms, L. S., Jerome, W. G., Dermody, T. S. & Chappell, J. D. Reovirus Replication  
33 Protein  $\mu 2$  Influences Cell Tropism by Promoting Particle Assembly within Viral  
34 Inclusions. *J. Virol.* **86**, 10979 LP-10987 (2012).
- 35 9. Georgiou, G. *et al.* The promise and challenge of high-throughput sequencing of the  
36 antibody repertoire. *Nat. Biotechnol.* **32**, 158–68 (2014).
- 37 10. DeKosky, B. J. *et al.* In-depth determination and analysis of the human paired heavy- and  
38 light-chain antibody repertoire. *Nat. Med.* **21**, 86–91 (2015).
- 39 11. Vollmers, C., Sit, R. V., Weinstein, J. A., Dekker, C. L. & Quake, S. R. Genetic  
40 measurement of memory B-cell recall using antibody repertoire sequencing. *Proc. Natl.*  
41 *Acad. Sci. U. S. A.* **110**, 13463–13468 (2013).
- 42 12. Kaminski, D., Wei, C., Qian, Y., Rosenberg, A. & Sanz, I. Advances in Human B Cell  
43 Phenotypic Profiling. *Frontiers in Immunology* **3**, 302 (2012).
- 44 13. Smith, K. *et al.* Antigen nature and complexity influence human antibody light chain  
45 usage and specificity. *Vaccine* **34**, 2813–2820 (2016).
- 46 14. Abe, M. *et al.* Differences in kappa to lambda ( $\kappa:\lambda$ ) ratios of serum and urinary free light  
47 chains. *Clin. Exp. Immunol.* **111**, 457–462 (1998).

- 1 15. Barandun, S. Immunsustitution BT - 84. Kongreß. in (ed. Schlegel, B.) 481–490 (J.F.  
2 Bergmann-Verlag, 1978).
- 3 16. Kugelberg, E. Making sense in humans. *Nat. Rev. Immunol.* **15**, 133 (2015).
- 4 17. Mroczek, E. S. *et al.* Differences in the composition of the human antibody repertoire by B  
5 cell subsets in the blood. *Front. Immunol.* **5**, 96 (2014).
- 6 18. DeKosky, B. J. *et al.* Large-scale sequence and structural comparisons of human naive  
7 and antigen-experienced antibody repertoires. *Proc. Natl. Acad. Sci.* **113**, E2636 LP-  
8 E2645 (2016).
- 9 19. DeKosky, B. J. *et al.* High-throughput sequencing of the paired human immunoglobulin  
10 heavy and light chain repertoire. *Nat. Biotechnol.* **31**, 166–9 (2013).
- 11 20. Weinstein, J. A., Zeng, X., Chien, Y.-H. & Quake, S. R. Correlation of Gene Expression  
12 and Genome Mutation in Single B-Cells. *PLoS One* **8**, e67624 (2013).
- 13

## 1 FIGURES and LEGENDS

2

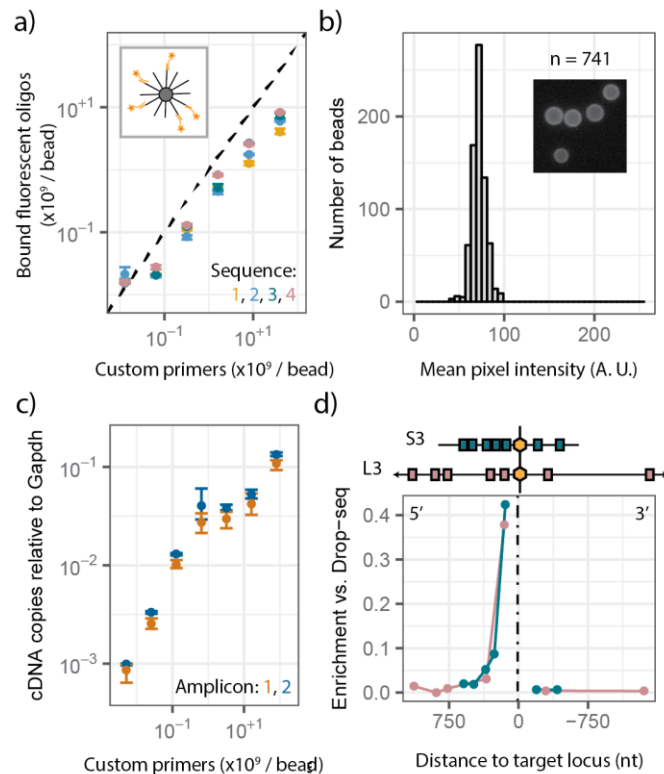

3

4

5 **Fig. 1: Characterization of DART-seq primer bead synthesis and RT priming.** (a)

6 Number of fluorescence probes bound per bead as function of the number of primers per

7 bead included in the ligation reaction (four distinct primer sequences). Error bars indicate

8 the minimum and maximum of three replicate measurements, points indicate the mean.

9 The dotted line indicates expected values for 100% ligation efficiency. Inset: Schematic

10 of fluorescence hybridization assay. (b) Bead-to-bead variability in fluorescence pixel

11 intensity ( $n = 741$  beads, maximum pixel intensity is 255). Inset: representative

12 fluorescence microscopy image of beads. (c) cDNA copies of reovirus RNA relative to

13 *Gapdh* as function of the number of custom primers included in the ligation reaction (bulk

14 assay). Error bars indicate minimum and maximum of three replicates, points indicate the

15 mean. (d) Enrichment of PCR amplicons relative to *Gapdh* in DART-seq versus Drop-seq

16 libraries as function of distance to the target locus. Measurement for two reovirus genes

17 (S3 in green and L3 in violet).

18

19

20



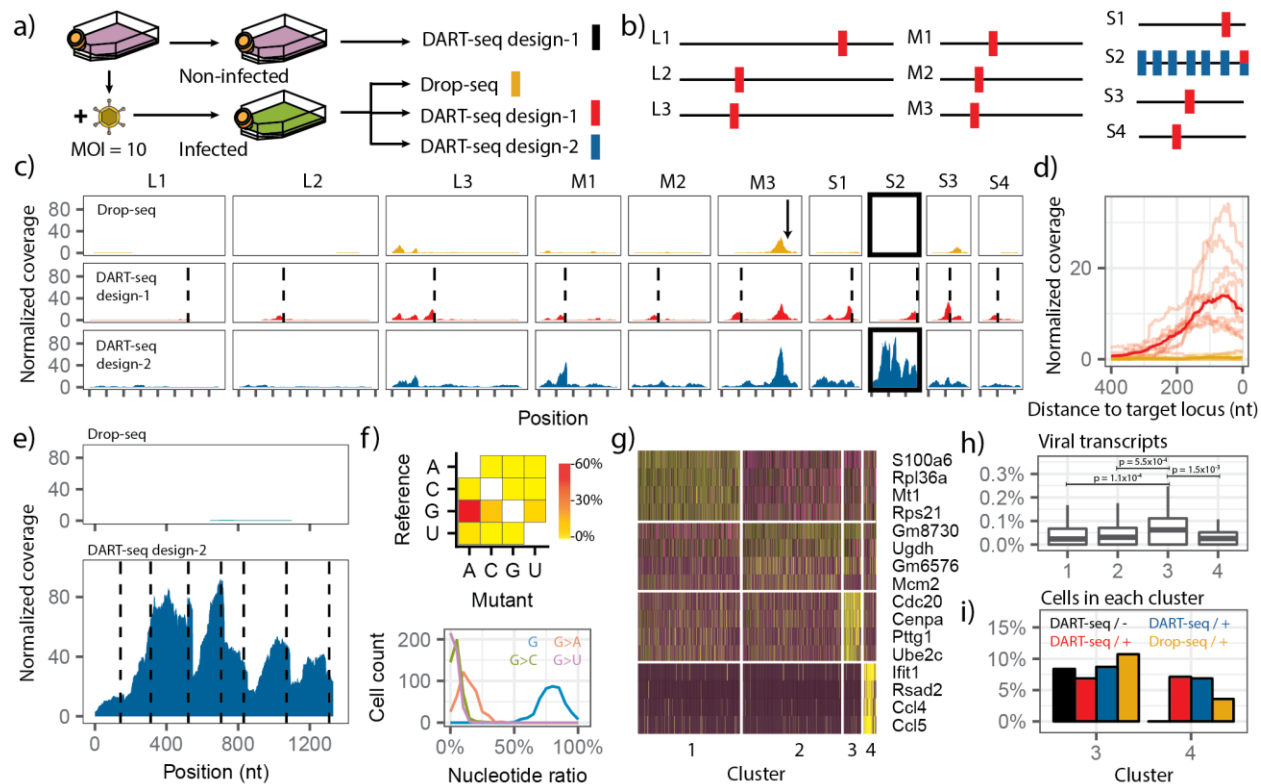

1  
2 **Figure 2 - DART-seq reveals heterogeneity in viral genotypes and host response to**  
3 **infection.** (a) Experimental design. (b) Schematic of DART-seq designs (design-1, red  
4 bars, design-2 blue bars). (c) Comparison of the sequence coverage (normalized to host  
5 UMI detected  $\times 10^6$ ) of the 10 reovirus gene segments (columns) for three different library  
6 preparations (rows). Arrow indicates an A<sub>5</sub> pentanucleotide sequence part of segment  
7 M3. Dotted lines indicate DART-seq target positions. (d) Per-base coverage upstream  
8 (5'-end) of 10 custom primers of DART-seq design-1 (light red, average shown in dark  
9 red), and mean coverage achieved with Drop-seq (yellow). (e) Per-base coverage of the  
10 S2 gene segment achieved with DART-seq design-2 (bottom, dashed lines indicate  
11 custom primer positions) and Drop-seq (top). (f) Frequency and pattern of base mutations  
12 (top); histogram of nucleotide ratios for positions with reference nucleotide G detected in  
13 single cells (bottom). (g) Clustering analysis for variable gene expression of reovirus  
14 infected L cells (DART-seq design-1, yellow/purple is higher/lower expression). Similar  
15 clustering was observed in all three experiments with infected cells. (h) Relative  
16 abundance of viral transcripts in L-cell clusters (p-values determined by two-tailed Wilcoxon  
17 rank sum test). Lower and upper hinges correspond to 25th and 75th percentiles,  
18 respectively. Lower/upper whisker corresponds to smallest/largest value within 150% of  
19 the interquartile range from the nearest hinge (cluster 1, n = 411 ; cluster 2, n = 397 ;  
20 cluster 3, n = 50 ; cluster 4, n = 69). (i) Fraction of cells in meta-clusters for four  
21 experiments depicted in panel a with assay type and infection status (+ or -) indicated.

22  
23

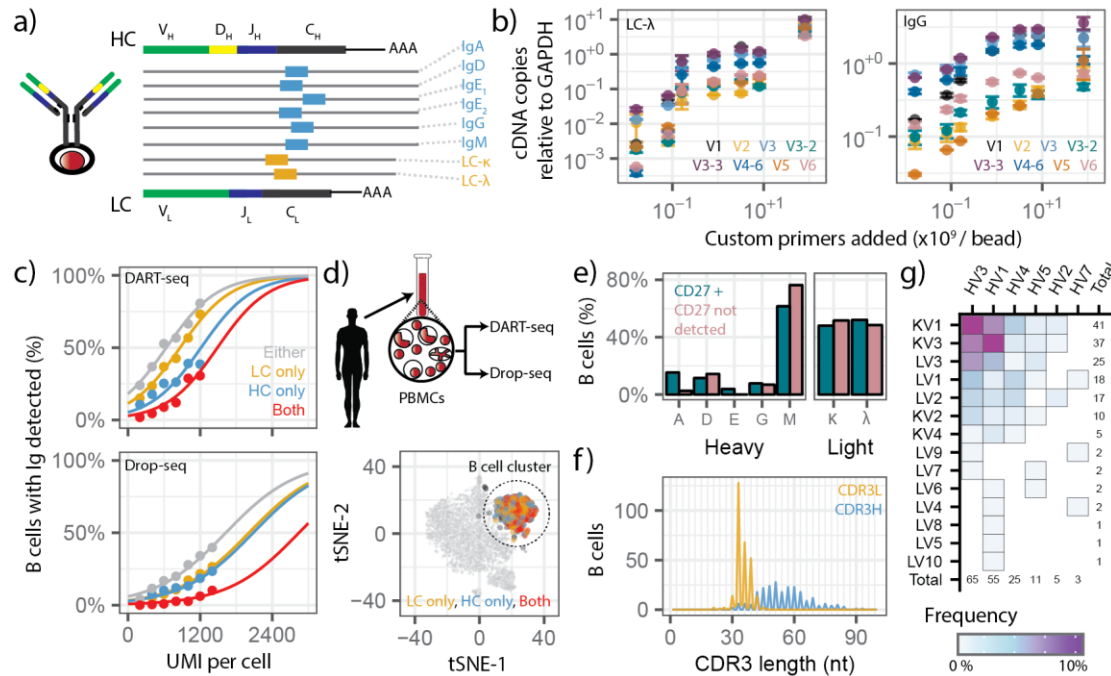

1  
2  
3  
4  
5  
6  
7  
8  
9  
10  
11  
12  
13  
14  
15  
16  
17  
18  
19  
20  
21

**Fig. 3 DART-seq measures paired heavy and light chain B cell transcripts at single cell resolution.** (a) DART-seq custom primer design targeting the constant region of human heavy and light isotypes. (b) cDNA copies of Ig transcripts relative to *GAPDH* as a function of the number of custom primers included in the ligation reaction (left panel, LC $\lambda$ +V primers; right panel: IgG+V primers, 62500 cells, 12000 beads, bulk assay). Points are mean of two replicate measurements, bars indicate the minimum and the maximum. (c) Percentage of B cells for which heavy and/or light chain transcripts were detected as a function of the UMI count per cell. Cells were binned by the number of UMI detected (bin width 200 UMI, 0-2400 UMI per cell, bins with fewer than 20 cells omitted, 26 - 2396 cells per bin). Distributions were fit with a sigmoid curve (Methods). (d) Drop-seq and DART-seq assays of human PBMCs. Experiments were performed on two distinct PBMC samples (n=2). Representative t-distributed Stochastic Neighbor Embedding (tSNE) for one DART-seq assay shown here (4997 single cells). Cells are colored based on heavy and/or light chain transcript detection. (e) Bar graph of isotype distribution for CD27+ B cells and B cells for which CD27 was not detected. (f) CDR3L and CDR3H length distribution. 818 B cells were used for the analysis. (g) Paired heavy (IGHV) and light (IGKV and IGLV) variable chain usage in B cells, (164 single cells).

## 1 ONLINE METHODS

2

3 **Step-by-step protocol.** A detailed step-by-step protocol, including all reagents and  
4 primers used, is included as a supplemental file.

5 **Primer bead synthesis.** Single-stranded DNA (ssDNA) primer sequences were  
6 designed to complement regions of interest. The probes were annealed to the  
7 complementary splint sequences that also carry a 10-12 bp overhang of A-repeats  
8 (Supplementary table). All oligos were resuspended in Tris-EDTA (TE) buffer at a  
9 concentration of 500  $\mu$ M. Double-stranded toehold adapters<sup>21</sup> were created by heating  
10 equal volumes (20  $\mu$ L) of the custom primer and splint oligos in the presence of 50 mM  
11 NaCl. The reaction mixture was heated to 95 °C and cooled to 14 °C at a slow rate (-0.1  
12 °C/s). The annealed mixture of dsDNA probes was diluted with TE buffer to obtain a final  
13 concentration of 100  $\mu$ M. Equal amounts of custom primer probes were mixed and the  
14 final mixture diluted to obtain the desired probe concentration ( $8.03 \times 10^8$  custom primers  
15 per bead for reovirus DART-seq design-1 and B-cell DART-seq, and  $4.01 \times 10^9$  custom  
16 primers for reovirus DART-seq design-2). 16  $\mu$ L of this pooled probe mixture was  
17 combined with 40  $\mu$ L of PEG-4000 (50% w/v), 40  $\mu$ L of T4 DNA ligase buffer, 72  $\mu$ L of  
18 water, and 2  $\mu$ L of T4 DNA Ligase (30 U/ $\mu$ L, Thermo Fisher). Roughly 12,000 beads were  
19 combined with the above ligation mix and incubated for 1 hr at 37 °C (15 second  
20 alternative mixing at 1800 rpm). After ligation, enzyme activity was inhibited (65 °C for 3  
21 minutes) and beads were quenched in ice water. To obtain the desired quantity of DART-  
22 seq primer beads, 6-10 bead ligation reactions were performed in parallel. All reactions  
23 were pooled, and beads were washed once with 250  $\mu$ L Tris-EDTA Sodium dodecyl  
24 sulfate (TE-SDS) buffer, and twice with Tris-EDTA-Tween 20 (TE-TW) buffer. DART-seq  
25 primer beads were stored in TE-TW at 4 °C.

26 **Cell preparation.** Murine L929 cells (L cells) in suspension culture were infected with  
27 recombinant Type 3 Dearing reovirus<sup>22,23</sup> at MOI 10. After 15 hours of infection, the cells  
28 were centrifuged at 600 x g for 10 minutes and resuspended in PBS containing 0.01%  
29 BSA. Two additional washes were followed by centrifugation at 600 x g for 8 min, and  
30 then resuspended in the same buffer to a final concentration of 300,000 cells/mL (120,000  
31 cells/mL in replicate experiment). Human CD19+ B cells or PBMCs were obtained from  
32 Zen-Bio (B cells: SER-CD19-F, PBMCs: SER-PBMC-F). Cells were washed three times  
33 with PBS containing 0.01% BSA, each wash followed by centrifugation at 1500 rpm for 5  
34 min, and then resuspended in the same buffer. The cell suspension was filtered through  
35 a 40  $\mu$ m filter and resuspended to a final concentration of 120,000 cells/mL.

36 **Single cell library preparation.** Single cell library preparation was carried out as  
37 described<sup>2</sup>. Briefly, single cells were encapsulated with beads in a droplet using a  
38 microfluidics device (FlowJEM, Toronto, Ontario). After cell lysis, cDNA synthesis was  
39 carried out (Maxima Reverse Transcriptase, Thermo Fisher), followed by PCR (2X Kapa  
40 Hotstart Ready mix, VWR, 15 cycles). cDNA libraries were tagmented and PCR amplified

1 (Nextera tagmentation kit, Illumina). Finally, libraries were pooled and sequenced  
2 (Illumina Nextseq 500, 20x130 bp).  $2.6 \times 10^7$  to  $3.7 \times 10^7$  sequencing reads were generated  
3 for the experiments described in Figure 2.  $4.2 \times 10^7$  to  $6.8 \times 10^8$  sequencing reads were  
4 generated for the experiments described in Figure 3.

5 **qPCR measurement of reverse transcription yield.** 80,000 L cells or 62,500 B cells  
6 were lysed in one mL of lysis buffer, and placed on ice for 15 minutes with brief vortexing  
7 every 3 minutes. After lysis and centrifugation (14,000 RPM for 15 minutes at 4°C), the  
8 supernatant was transferred to a tube containing 12,000 DART-seq beads. The bead and  
9 supernatant mixture was rotated at room temperature for 15 minutes and then rinsed  
10 twice with 1 mL 6x SSC. Reverse transcription, endonuclease treatment, and cDNA  
11 amplification steps performed as described above, with the exception that all reagent  
12 volumes were decreased by 80%. Following cDNA amplification and cleanup (following  
13 manufacturer's instructions, Beckman Coulter Ampure beads), the total yield of cDNA  
14 was measured (Qubit 3.0 Fluorometer, HS DNA).

15 **qPCR measurements of amplicon enrichment in sequencing libraries.** 0.1 ng DNA  
16 from sequencing libraries was used per qPCR reaction. Each reaction was comprised of  
17 1  $\mu$ L cDNA (0.1 ng/ $\mu$ L), 10  $\mu$ L of iTaq™ Universal SYBR® Green Supermix (Bio-Rad),  
18 0.5  $\mu$ L of forward primer (10  $\mu$ M), 0.5  $\mu$ L of reverse primer (10  $\mu$ M) and 13  $\mu$ L of DNase,  
19 RNAse free water. Reactions were performed in a sealed 96-well plate using the following  
20 program in the Bio-Rad C1000 Touch Thermal Cycler: (1) 95 °C for 10 minutes, (2) 95 °C  
21 for 30 seconds, (3) 65 °C for 1 minute, (4) plate read in SYBR channel, (5) repeat steps  
22 (2)-(4) 49 times, (6) 12 °C infinite hold. The resulting data file was viewed using Bio-Rad  
23 CFX manager and the Cq values were exported for further analysis. Each reaction was  
24 performed with two technical replicates.

25 **Fluorescence hybridization assay.** Roughly 6,000 DART-seq beads were added to a  
26 mixture containing 18  $\mu$ L of 5M NaCl, 2  $\mu$ L of 1M Tris HCl pH 8.0, 1  $\mu$ L of SDS, 78  $\mu$ L of  
27 water, and 1  $\mu$ L of 100  $\mu$ M Cy5 fluorescently labeled oligo (see Supplementary Table).  
28 The beads were incubated for 45 minutes at 46 °C in an Eppendorf ThermoMixer C (15",  
29 at 1800 RPM). Following incubation, the beads were pooled and washed with 250  $\mu$ L TE-  
30 SDS, followed by 250  $\mu$ L TE-TW. The beads were suspended in water and imaged in the  
31 Zeiss Axio Observer Z1 in the Cy5 channel and bright field. A custom Python script was  
32 used to determine the fluorescence intensity of each bead.

33 **Fluorescence hybridization assay to determine ligation efficiencies.** Roughly 3,000  
34 DART-seq beads were added to a mixture containing 18  $\mu$ L of 5M NaCl, 2  $\mu$ L of 1M Tris  
35 HCl pH 8.0, 1  $\mu$ L of SDS, 78  $\mu$ L of water, and 1  $\mu$ L of 100  $\mu$ M Cy5 fluorescently labeled  
36 oligo (see Supplementary Table). The beads were incubated for 45 minutes at 46 °C in  
37 an Eppendorf ThermoMixer C (15", at 1800 RPM). Following incubation, the beads were  
38 pooled and washed with 250  $\mu$ L TE-SDS, followed by 250  $\mu$ L TE-TW. The beads were  
39 suspended in 200  $\mu$ L of DNase/RNase free water and transferred to a Qubit assay tube  
40 (ThermoFisher Scientific, Q32856). Qubit 3.0 Fluorometer was set to "Fluorometer" mode

1 under the “635 nm” emission setting. The tube was vortexed briefly and placed in the  
2 fluorometer for immediate readout. Two additional vortexing and measurement steps  
3 were performed.

4 **Single cell host transcriptome profiling.** We used previously described bioinformatic  
5 tools to process raw sequencing reads<sup>1</sup>, and the Seurat package for downstream  
6 analysis<sup>24</sup>. Cells with low overall expression or a high proportion of mitochondrial  
7 transcripts were removed. For clustering, we used principal component analysis (PCA),  
8 followed by k-means clustering to identify distinct cell states. t-stochastic neighborhood  
9 embedding<sup>25</sup> (tSNE) was used to visualize cell clustering. For meta-clustering, host  
10 expression matrices from all four experiments were merged using Seurat<sup>24</sup>. Cells with  
11 fewer than 2000 host transcripts were excluded from the analysis in Figure 2. Cells with  
12 fewer than 100 unique genes detected were excluded from the analysis in Figure 3.

13 **Viral genotype analysis.** Sequencing reads that did not align to the host genome were  
14 collected and aligned to the T3D reovirus genome<sup>26</sup> (GenBank Accession EF494435-  
15 EF494445). Aligned reads were tagged with their cell barcode and sorted. The per-base  
16 coverage across viral gene segments was computed (Samtools<sup>27</sup> depth). Positions where  
17 the per-base coverage exceeded 50, and where a minor allele with frequency greater  
18 than 10% was observed, were labeled as single nucleotide variant (SNV) positions. The  
19 frequency of SNVs was calculated across all cells. For the combined host virus analysis,  
20 the host expression matrix and virus alignment information were merged. The per-base  
21 coverage of the viral genome was normalized by the number of host transcripts. Cells  
22 with fewer than 1500 host transcripts were excluded from the analysis.

23 **Immunoglobulin identification and analysis.** Sequences derived from B cells were  
24 collected and aligned to a catalog of human germline V, D, J and C gene sequences using  
25 MiXCR version 2.1.5<sup>28</sup>. For each cell, the top scoring heavy and light chain variable  
26 regions were selected for subtyping and pairing analyses (Fig. 3e and Fig. 3g).

27 **Sigmoidal fitting heavy/light chain capture.** The mapping for the fractions of B cells  
28 containing heavy chains or light chains was fit with the following sigmoidal function:

29 
$$f(x) = \frac{1}{1 + e^{-b/(x-c)}} .$$

30 Where the parameter b was a free parameter for the fit of the light chain or heavy chain  
31 data, and then fixed for the light chain only, heavy chain only, and combined light chain  
32 and heavy chain data.

33 **Statistical analysis.** Statistical tests were performed in R version 3.3.2<sup>29</sup>. Exact number  
34 of n values for each experiment are indicated in the figure legends. Error bars indicate  
35 the minimum and maximum of replicate measurements. Groups were compared using  
36 the two-tailed nonparametric Mann-Whitney U test. More information on the statistical  
37 parameters, sample size determination, and replication can be found in Life Sciences  
38 Reporting Summary.

39

40



## 1 DATA AVAILABILITY

2 Raw sequencing data and corresponding gene expression matrices have been made  
3 available: NCBI Gene Expression Omnibus; Project ID GSE113675.

4

## 5 CODE AVAILABILITY

6 Custom scripts are available at: <https://github.com/pburnham50/DART-seq>.

7

## 8 METHODS ONLY REFERENCES

9

- 10 21. Gansauge, M.-T. *et al.* Single-stranded DNA library preparation from highly degraded  
11 DNA using T4 DNA ligase. *Nucleic Acids Res.* **45**, e79 (2017).
- 12 22. Patton, J. T. & Spencer, E. Genome replication and packaging of segmented double-  
13 stranded RNA viruses. *Virology* **277**, 217–25 (2000).
- 14 23. Joklik, W. K. Structure and function of the reovirus genome. *Microbiol. Rev.* **45**, 483–501  
15 (1981).
- 16 24. Satija, R., Farrell, J. A., Gennert, D., Schier, A. F. & Regev, A. Spatial reconstruction of  
17 single-cell gene expression data. *Nat. Biotechnol.* **33**, 495–502 (2015).
- 18 25. van der Maaten, L. & Hinton, G. E. Visualizing data using t-SNE. *J. Mach. Learn.* **9**,  
19 2579–2605 (2008).
- 20 26. Kobayashi, T. *et al.* A plasmid-based reverse genetics system for animal double-stranded  
21 RNA viruses. *Cell Host Microbe* **1**, 147–57 (2007).
- 22 27. Li, H. *et al.* The Sequence Alignment/Map format and SAMtools. *Bioinformatics* **25**,  
23 2078–2079 (2009).
- 24 28. Bolotin, D. A. *et al.* MiXCR: software for comprehensive adaptive immunity profiling. *Nat.*  
25 *Methods* **12**, 380–1 (2015).
- 26 29. Team, R. C. R: A Language and Environment for Statistical Computing. *R Foundation for*  
27 *Statistical Computing* (2016). at <<http://www.r-project.org/>>  
28
